# Supplementary material
Source: PubMed Central journal article supplement (PMC3133911)
Supplement: supp_138.15.3189_DEV063073TableS1.pdf [file supp_138.15.3189_DEV063073TableS1.pdf]

**Table S1. Flowering time phenotypes of *lmi2* mutants**

| Genotype             | Rosette leaves | Student's <i>t</i> -test |
|----------------------|----------------|--------------------------|
| Wild type (Col)      | 9.9±0.2 (33)   |                          |
| <i>lmi2-1</i>        | 10.0±0.2 (32)  | 1/5                      |
| <i>lmi2-2</i>        | 10.5±0.2 (33)  | 5/5                      |
| <i>lfy-10</i>        | 9.4±0.2 (28)   |                          |
| <i>lmi2-1 lfy-10</i> | 9.3±0.2 (24)   | 2/5                      |
| <i>lmi2-2 lfy-10</i> | 11.8±0.3 (28)  | 8/8                      |
| <i>lfy-10</i>        | 8.5±0.3 (37)   |                          |
| <i>lmi2-3 lfy-10</i> | 8.1±0.3 (14)   | 0/6                      |
| <i>lfy-1</i>         | 12.5±0.2 (21)  |                          |
| <i>lmi2-2 lfy-1</i>  | 12.7±0.2 (17)  | 0/3                      |
| <i>ap1-10</i>        | 5.9±0.2 (12)   |                          |
| <i>lmi2-2 ap1-10</i> | 6.5±0.3 (13)   | 2/5                      |

Average number of rosette leaves ± s.e.m. for one representative experiment are shown. The number of plants counted is indicated in the parentheses. All phenotypic experiments were performed multiple times and one-sided Student's *t*-tests were performed for each experiment. The alternative hypothesis ( $H_1$ ) is *lmi2* mutants have more lateral organs compared with the control genotype. Listed under Student's *t*-test are the number of experiments with a *P*-value less than 0.05 out of the total number of experiments performed.
