# Supplementary material
Source: PubMed Central journal article supplement (PMC3133911)
Supplement: supp_138.15.3189_DEV063073TableS2.pdf [file supp_138.15.3189_DEV063073TableS2.pdf]

**Table S2. Genotyping primers**

| Primer name                                 | Sequence (5' to 3')            |                              |
|---------------------------------------------|--------------------------------|------------------------------|
|                                             | Forward                        | Reverse                      |
| <i>LMI2</i> <sup>*</sup>                    | TCTGAAGGAGACCTGTAGTTGCTG       | GAGCCTGTGAGTAGCTGTCAATGT     |
| <i>lmi2-1</i>                               | (LB1.3) ATTTTGCCGATTTTCGGAAC   | GAGCCTGTGAGTAGCTGTCAATGT     |
| <i>lmi2-2</i>                               | TCTGAAGGAGACCTGTAGTTGCTG       | (LB1.3) ATTTTGCCGATTTTCGGAAC |
| <i>LMI2</i> <sup>†</sup>                    | CTGAAAGCTTCACCAATCTCG          | AAATTCATTGCTTCCTTTGGC        |
| <i>lmi2-3</i>                               | CTGAAAGCTTCACCAATCTCG          | (LB1.3) ATTTTGCCGATTTTCGGAAC |
| <i>lfy-1</i> <sup>‡</sup>                   | AAGCAGCCGTCTGCGGTGTCAGCAGCTGTT | CTGTCAATTTCCAGCAAGACAC       |
| <i>lfy-2</i> and <i>lfy-10</i> <sup>§</sup> | AGAGAGACAGAGGGAGGATC           | TGTCGCATTTTAGGCTTGTT         |

\*Gene-specific primers for *lmi2-1* and *lmi2-2*.

†Gene-specific primers for *lmi2-3*.

‡Cut wild-type band with *Bst*API.

§Cut wild-type band with *Bam*HI.
