# Supplementary material
Source: PubMed Central journal article supplement (PMC3133911)
Supplement: supp_138.15.3189_DEV063073TableS3.pdf [file supp_138.15.3189_DEV063073TableS3.pdf]

Table S3. Cloning primers

| Construct              | Sequence (5' to 3')              |                                       |
|------------------------|----------------------------------|---------------------------------------|
|                        | Forward                          | Reverse                               |
| pLMI2:LMI2             | aaaaagcaggctGAAACGTGTCTCCACCCAAT | agaaagctgggttCTAGAATTTGGAAACCATGGA    |
| LMI2:GUS*              | GTCGACACTTGAACTGTGCATGAAAC       | CCCGGGGATTGTTCCCTCACCCCACTAACA        |
| LMI2:GUS <sup>†</sup>  | GAGCTCGTCTTATGAGAGCCTAATATC      | CAATTGAATTTTCTCAAGCATTGTCAC           |
| <i>LMI2</i> in situ    | CTTTTATCTATGGGTCTTGATCCC         | GAATGGTTAATTGTTAATGTTCTGCAA           |
| <i>AP1</i> in situ     | CGGAATTCCTTACGCCGAAAGACAGCTT     | CGGGATCCCGTTCATTCTCTGACCTCA           |
| pLMI2:LMI2-HA          | aaaaagcaggctGAAACGTGTCTCCACCCAAT | agaaagctgggttGAATTTGGAAACCATGGAAAC    |
| GST-LFY                | TAGAATTCATGGATCCTGAAGGTTTCAC     | ATGCGGCCGCTAGAAACGCAAGTCGTCGC         |
| LMI2N                  | GAGGTCGACCATGGGAAGAACACCTTGTTG   | TTAGCGGCCGCTATGATTCTTAGAAAGCCTTGC     |
| LMI2C                  | GAGGTCGACCAGAGAATCAATGCTCTTTAGC  | ATAGTTTAGCGGCCGCTAGAAATTTGGAAACCATGGA |
| LFY <sup>‡</sup>       | aaaaagcaggctacATGGATCCTGAAGGTTTC | agaaagctgggttCTAGAAACGCAAGTCGTC       |
| LFY <sup>§</sup>       | CACCATGGATCCTGAAGGTTTCACGAG      | GAAACGCAAGTCGTCGCC                    |
| 2xmCherry <sup>§</sup> | CACCATGGTGAGCAAGGGCGAGGAG        | CTTGACAGCTCGTCCATGCCG                 |

Lower case sequences are *attB1* and *attB2* sequence specific.

\*Primers used to amplify *LMI2* upstream intergenic region.

<sup>†</sup>Primers used to amplify *LMI2* downstream intergenic region.

<sup>‡</sup>Primers used for yeast-two-hybrid constructs.

<sup>§</sup>Primers used for bimolecular fluorescence complementation (BiFC) constructs.
