# Supplementary material
Source: PubMed Central journal article supplement (PMC3133911)
Supplement: supp_138.15.3189_DEV063073TableS4.pdf [file supp_138.15.3189_DEV063073TableS4.pdf]

**Table S4. Semi-quantitative and quantitative PCR primers**

| Gene                      | Sequence (5' to 3')         |                               | PCR cycle number |
|---------------------------|-----------------------------|-------------------------------|------------------|
|                           | Forward                     | Reverse                       |                  |
| <i>LM12*</i>              | (P1) TCATTGCTTCCTTTGGCTTT   | (P2) CTCATCTTCTTCAGGCGTCC     | 32               |
| <i>LM12*</i>              | (P3) GACGCCTGAAGAAGATG AGG  | (P4) TGTGGCGAGTTGTTGGTGA AGAT | 32               |
| <i>EIF4A<sup>†</sup></i>  | AAACTCAATGAAGTACTTGAGGGACA  | TCTCAAAACCATAAGCATAAATACCC    | 24               |
| <i>EIF4A1<sup>†</sup></i> | GCCATGGGTCTTCAAGAGAA        | CCCTTACAGAAGGGGACGAT          | NA               |
| <i>AP1<sup>†</sup></i>    | GAAGGCCATACAGGAGCAAA        | ACTGCTCCTGTTGAGCCCTA          | NA               |
| <i>AP1<sup>†</sup></i>    | AGGGAAAAAATTCTTAGGGCTCAACAG | GCGGCGAAGCAGCCAAGGTTGCAGTTG   | NA               |
| <i>AP3</i>                | GCCCTAACACCACAACGAAGG       | CTCACCTAGCCTCTGCTTGATC        | NA               |
| <i>CAL</i>                | CATTTCAACACCCCATCTT         | GCCGTTTGGTCTTCTTCTTG          | NA               |
| <i>FUL</i>                | TTGCAAGATCACAACAATTCGCTTCT  | GAGAGTTTGGTCCGTCAACGACGAT     | NA               |
| <i>LFY</i>                | ACGCCGTCATTTGCTACTCT        | CTTTCTCCGTCTCTGCTGCT          | NA               |
| <i>LM11</i>               | ATGGCCGGAGTCTAGTTCCT        | GTTGTTCCGAAATCGGTACG          | NA               |
| <i>LM12</i>               | GACGCCTGAAGAAGATGAGG        | GAATGGCATGAAGCTGGATAA         | NA               |
| <i>LM13</i>               | GAACGAATGGGACACGTTAT        | CAGACAATTCAGGATTGCCAG         | NA               |
| <i>LM14</i>               | AATGGTGTCCGGTGAGATT         | CATAACCACCGAATCCAACC          | NA               |
| <i>LM15</i>               | AACTGGTGGTCGAACAGCTC        | AAGTGCATCTTCCCACATCC          | NA               |

NA, not applicable (primers used for quantitative PCR).

\*Primers used for T-DNA allele analysis.

<sup>†</sup>Primer sets used interchangeably for quantitative PCR. Both sets give similar results.
