# Supplementary material
Source: PubMed Central journal article supplement (PMC3133911)
Supplement: supp_138.15.3189_DEV063073TableS5.pdf [file supp_138.15.3189_DEV063073TableS5.pdf]

**Table S5. ChIP-qPCR primers**

| Locus (region) | Sequence (5' to 3')     |                           |
|----------------|-------------------------|---------------------------|
|                | Forward                 | Reverse                   |
| <i>AP1</i> (1) | CAAAGCTTAATGGGCCTTGA    | GTCCGTGAGCTTTGTTTGG       |
| <i>AP1</i> (2) | TCGAACGTGGTGGTTAGAAG    | CGCAGCAGCTAGCATCTATT      |
| <i>AP1</i> (3) | AGAATGGTGGGGCTAAAAGC    | CAATCCAGCCACATCAAATG      |
| <i>AP1</i> (4) | CAAACCTTCCTGCCTTCTTT    | AATATCTCGATCCACTAAGATACGG |
| <i>AP1</i> (5) | GCAAATGCCGAATCTGTTT     | AAAAACCTTTGCTCAATTTGC     |
| <i>AP1</i> (6) | ACACTTGGGGAAGGACCAGT    | ATGTCGGGTCCATGATTTT       |
| <i>AP1</i> (7) | GGGGGTCTTTGTTTGTGTTG    | CCCTTCCATTTTGTATCCT       |
| <i>AP1</i> (8) | AATGTGTCGCATCTAAGAAGATT | TCGAGTTCTAACTGCGGTTTC     |
| <i>AP1</i> (9) | TGGGTTGTTAATGTTGATGTGTG | TGGACTIONTAAAGTTGGTTC     |
| <i>LFY</i> (1) | GCCAGTATTGCCAACTTTCC    | GGCCAACCTACGTCTTTTTC      |
| <i>LFY</i> (2) | TCACCACAGTGAAAACCCTAA   | TGTGTCTTGCTGGGAAATTG      |
| <i>LFY</i> (3) | GGAACCCAACGAGAGCATT     | TCTAAACCACCAAGTCGCATC     |
| <i>LFY</i> (4) | CTTTCGTTGGGAGCTTCTTG    | AGCGTGATGAGTACCGGAAT      |
| <i>LFY</i> (5) | ATGGGGTATGGTAGGGGAAC    | TGAAAACCCTGAGAAATCGTG     |
| <i>LFY</i> (6) | TTGATGTTGGGAAAATGTG     | TCCTGATTTCTTCGCGTACC      |
| <i>TA3</i>     | CGAAGACAGTCCGCTTACC     | GCTTGTCCGATTGTTTCGAT      |
