# Supplementary material
Source: PubMed Central journal article supplement (PMC3133911)

**A**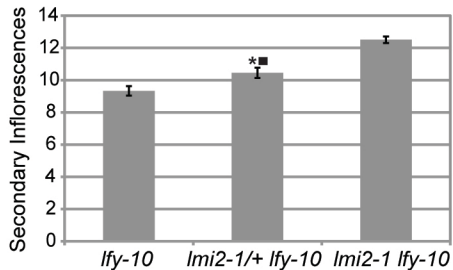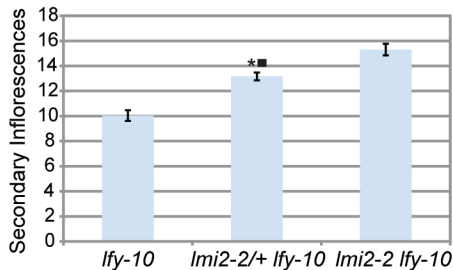**B**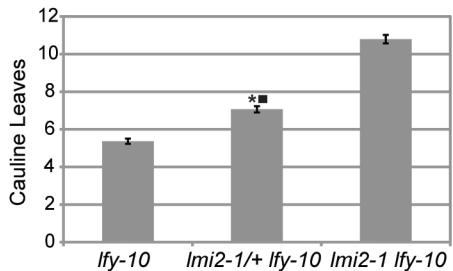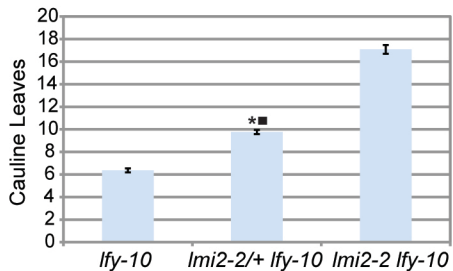**C**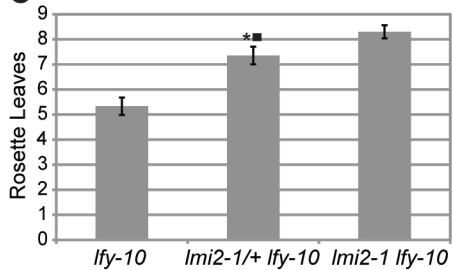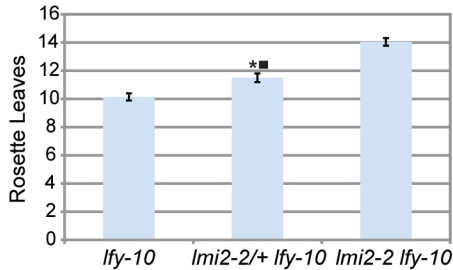

Supplement: supp_138.15.3189_DEV063073FigS1.pdf [file supp_138.15.3189_DEV063073FigS1.pdf]

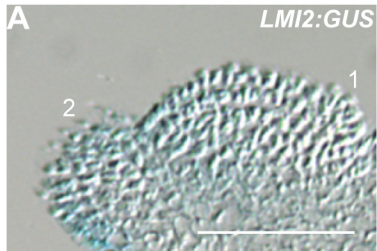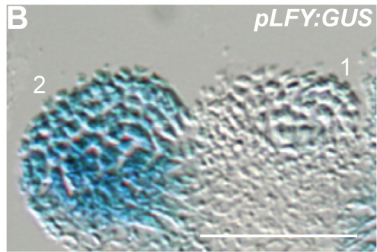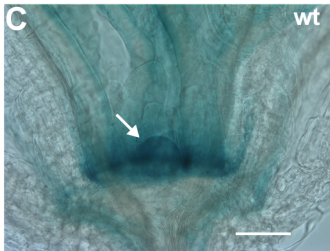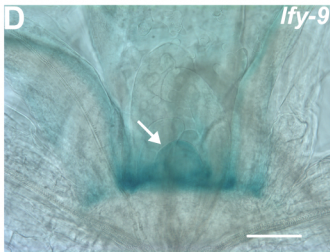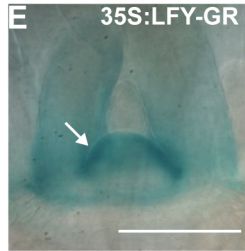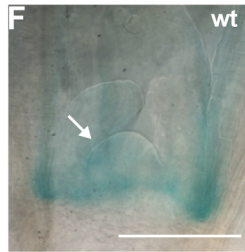

Supplement: supp_138.15.3189_DEV063073FigS2.pdf [file supp_138.15.3189_DEV063073FigS2.pdf]

**A**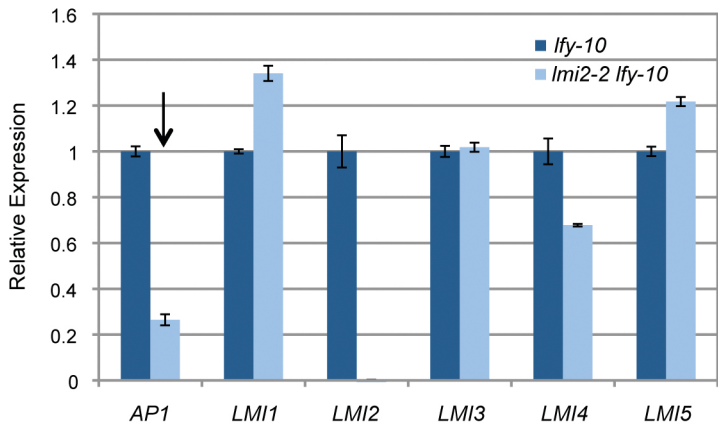**B**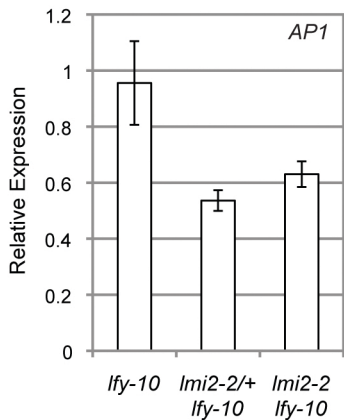**C**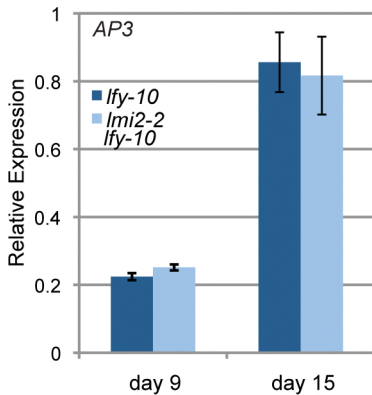

Supplement: supp_138.15.3189_DEV063073FigS3.pdf [file supp_138.15.3189_DEV063073FigS3.pdf]
